# Supplementary material
Source: MDPI journal article supplement (https://www.mdpi.com/2311-7524/9/3/386)
Supplement: s1 [file s1]

## Supplementary Materials

Table S1. List of all populations of *C. vulgaris* with geographic coordinates.

| №  | population      | N  | cod             | geographical coordinates |                |             |
|----|-----------------|----|-----------------|--------------------------|----------------|-------------|
|    |                 |    |                 | north latitude           | east longitude | altitude, m |
| 1  | Azorian insels  | 12 | AI              | 38°44'09.60"             | -27°16'15.60"  | 550         |
| 2  | Arkhangelsk     | 20 | Ar              | 64°21'51.70"             | 40°51'49.40"   | 32          |
| 3  | Belis           | 15 | Bs              | 46°37'11.46"             | 22°53'27.60"   | 1145        |
| 4  | Bordeaux        | 12 | Bd              | 44°49'21.32"             | -0°44'26.62"   | 50          |
| 5  | Bryansk         | 24 | Br              | 53°15'57.17"             | 34°23'45.95"   | 143         |
| 6  | Warsaw          | 25 | Ww              | 50°40'20.28"             | 22°24'05.76"   | 210         |
| 7  | Vyborg          | 18 | Vb              | 60°35'35.79"             | 29°02'46.80"   | 27          |
| 8  | Sweden -1       | 20 | Sw-1            | 58°14'30.01"             | 11°24'00.00"   | 17          |
| 9  | Gomel           | 32 | Gm              | 51°21'07.93"             | 31°06'02.71"   | 115         |
| 10 | Dalarna         | 17 | DI              | 60°29'42.00"             | 15°03'42.01"   | 300         |
| 11 | Djerdap         | 24 | Dj              | 44°39'51.69"             | 22°25'22.38"   | 305         |
| 12 | Dublin          | 10 | Db              | 52°57'46.08"             | -06°10'28.56"  | 153         |
| 13 | Zavodoukovsk    | 35 | Zuk             | 56°28'58.51"             | 66°32'24.70"   | 85          |
| 14 | Zavodouspensko  | 40 | Zus             | 57°13'00.00"             | 64°33'00.00"   | 110         |
| 15 | Yoshkar-Ola     | 28 | YO <sub>1</sub> | 56°42'37.20"             | 47°34'3.60"    | 135         |
| 16 | Kaliningrad     | 17 | KI              | 55°16'42.00"             | 20°58'06.00"   | 5           |
| 17 | Katwijk         | 12 | Kw              | 52°10'59.88"             | 05°49'59.88"   | 58          |
| 18 | Kem             | 15 | Km              | 64°57'52.40"             | 34°35'23.02"   | 20          |
| 19 | Kirov           | 37 | Kr              | 59°41'00.00"             | 52°50'00.00"   | 156         |
| 20 | Komissarovo     | 26 | Kms             | 56°14'43.94"             | 66°50'31.21"   | 130         |
| 21 | Kurgan          | 29 | Kg              | 55°31'16.90"             | 65°20'46.60"   | 132         |
| 22 | Istanbul        | 10 | Ist             | 41°52'21.80"             | 27°36'40.20"   | 357         |
| 23 | London          | 8  | ln              | 51°23'03.43"             | -0°45'45.75"   | 94          |
| 24 | Ljubljana       | 14 | Lbl             | 45°56'34.54"             | 14° 8'34.42"   | 560         |
| 25 | Lueneburg Heath | 25 | Lb              | 53°09'09.31"             | 09°56'07.13"   | 130         |
| 26 | Mizun           | 18 | Mz              | 48°51'52.87"             | 23°51'10.27"   | 1120        |
| 27 | Murmansk        | 24 | Mm              | 68°57'47.10"             | 32°46'11.41"   | 150         |
| 28 | Naroch          | 24 | Nch             | 54°55'34.68"             | 26°40'18.00"   | 190         |
| 29 | Nízke Tatry     | 20 | Nt              | 48°33'35.21"             | 18°28'14.41"   | 580         |
| 30 | Nizhny Novgorod | 24 | NN              | 56°36'36.30"             | 44°30'02.00"   | 116         |
| 31 | Veliky Novgorod | 24 | VN              | 58°47'51.63"             | 34°14'37.65"   | 184         |
| 32 | Oslo            | 16 | Os              | 59°33'59.25"             | 10°41'12.71"   | 70          |
| 33 | Penza           | 18 | Pz              | 53°38'58.30"             | 42°18'16.60"   | 186         |
| 34 | Pskov           | 28 | Ps              | 58°14'30.50"             | 28°04'14.10"   | 37          |
| 35 | Reykjavik       | 10 | RkB             | 64°07'47.02"             | -21°55'25.93"  | 45          |
| 36 | Cevennes        | 14 | Cv              | 44°14'30.77"             | 03°48'45.57"   | 600         |
| 37 | Seville         | 18 | Svl             | 37°02'54.71"             | -06°38'14.70"  | 35          |
| 38 | Tavda           | 22 | Tv              | 58°06'06.45"             | 65°03'52.43"   | 90          |
| 39 | Trentino        | 14 | Tr              | 46°12'13.23"             | 11°47'34.89"   | 1620        |

|    | population  | N <sup>1</sup> | cod  | geographical coordinates |                |             |
|----|-------------|----------------|------|--------------------------|----------------|-------------|
|    |             |                |      | north latitude           | east longitude | altitude, m |
| 40 | Tyumen      | 24             | Tm   | 57°00'30.00"             | 66°00'05.00"   | 67          |
| 41 | Uraj-1      | 24             | Ur-1 | 60°27'39.90"             | 64°30'01.50"   | 32          |
| 42 | Uraj-2      | 24             | Ur-2 | 60°27'39.90"             | 64°30'01.50"   | 32          |
| 43 | Faeroes     | 16             | FI   | 62°00'43.60"             | -06°46'00.40"  | 121         |
| 44 | Cherepovets | 20             | Chp  | 59°12'19.78"             | 37°08'58.16"   | 115         |
| 45 | Šumava      | 18             | Shm  | 48°54'09.00"             | 13°50'10.32"   | 770         |
| 46 | Trabzon     | 14             | Trb  | 41°11'02.43"             | 39°74'95.90"   | 42          |
| 47 | Ankara      | 10             | An   | 39°92'59.30"             | 32°83'23.80"   | 938         |
| 48 | Luga        | 30             | Lg   | 58°7345.24"              | 29°79'62.55"   | 48          |
| 49 | Smolensk    | 24             | Sm   | 55°05'13.06"             | 32°13'16.88"   | 220         |
| 50 | Minsk       | 30             | Mk   | 53°48'50.00"             | 27°28'41.20"   | 281         |

**Table S1**(continuation). List of all populations of *C. vulgaris* with geographic coordinates.

<sup>1</sup>N - the number of studied samples in the population
